# Supplementary material for: Genomic determinants of antigen expression hierarchy in African trypanosomes
Source: Springer Nature journal article supplement (doi:10.1038/s41586-025-08720-w), 2025-03-12

---

**Supplementary information**

---

**Genomic determinants of antigen  
expression hierarchy in African  
trypanosomes**

---

In the format provided by the  
authors and unedited

## Supplementary Figure 1

|                                                | page |
|------------------------------------------------|------|
| Uncropped images of Figure 1b and ED Figure 4b | 1    |
| Uncropped images of ED Figure 4b               | 2    |
| Uncropped images of ED Figure 6b               | 3    |
| Uncropped images of ED Figure 6h               | 4    |

Figure 1b

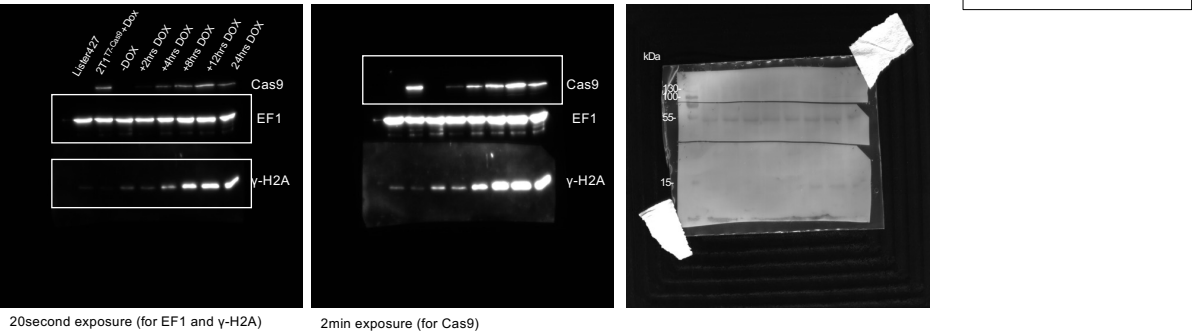

Controls were loaded on the same gel as the test samples.  
The membrane was cut in 3 (top for Cas9, middle for EF1 and bottom for  $\gamma$ -H2A detection) prior to primary antibody incubation. The three membranes were exposed together.

Extended data Figure 4b

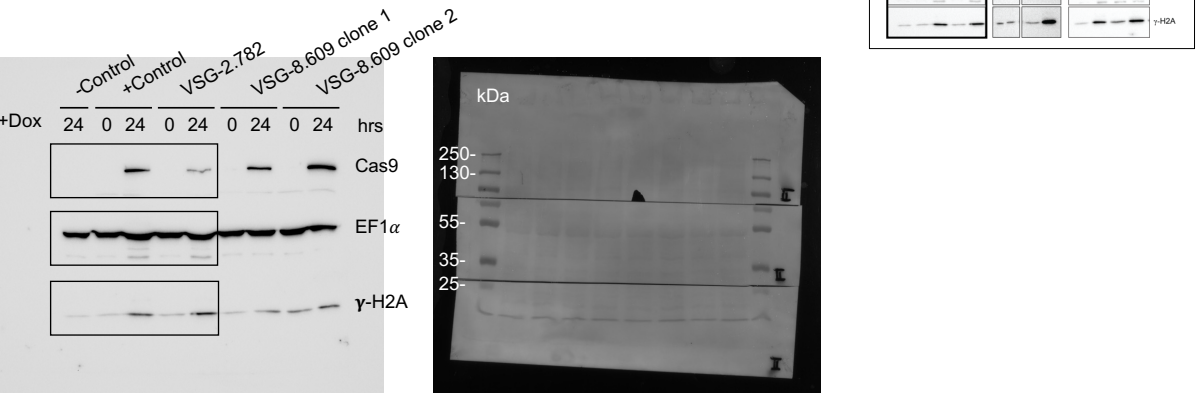

10-second exposure for Cas9, EF1 $\alpha$ ,  $\gamma$ -H2A. All membrane pieces (3) were exposed together.

Extended data Figure 4b

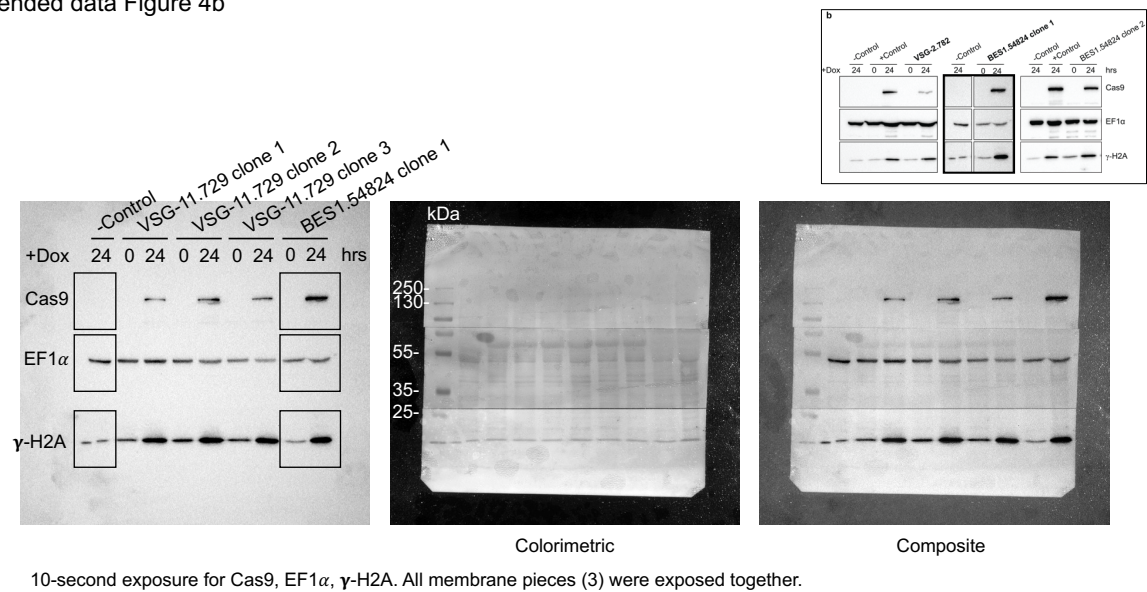

Extended data Figure 4b

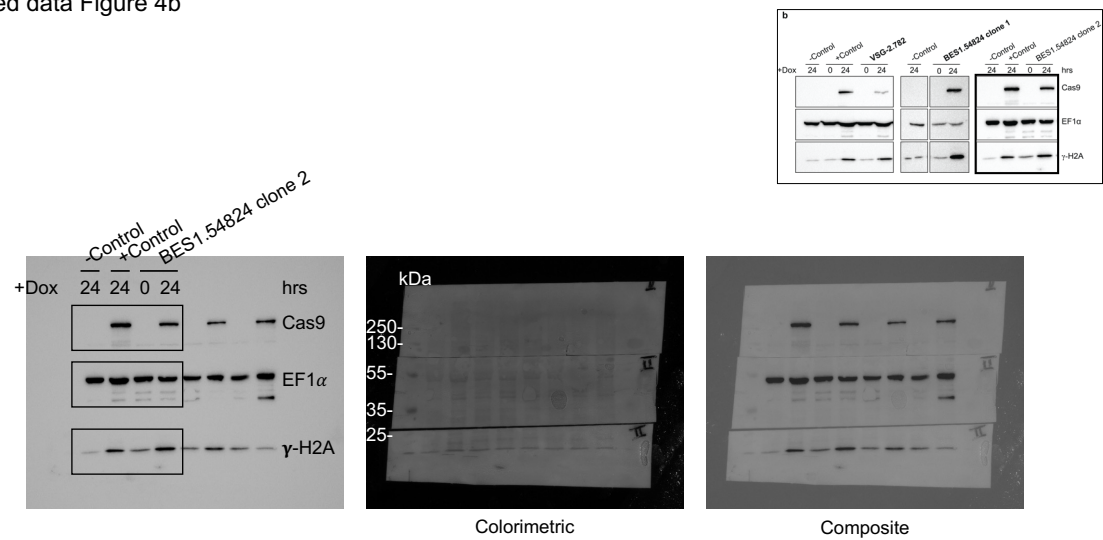

Extended data Figure 6b

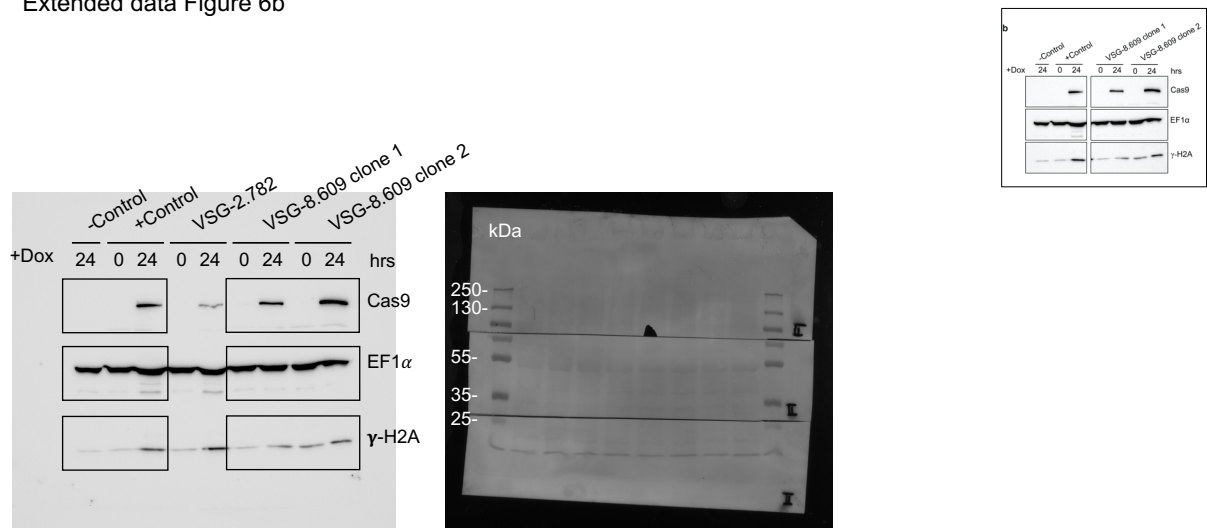

10-second exposure for Cas9, EF1 $\alpha$ ,  $\gamma$ -H2A. All membrane pieces (3) were exposed together.

Extended data Figure 6b

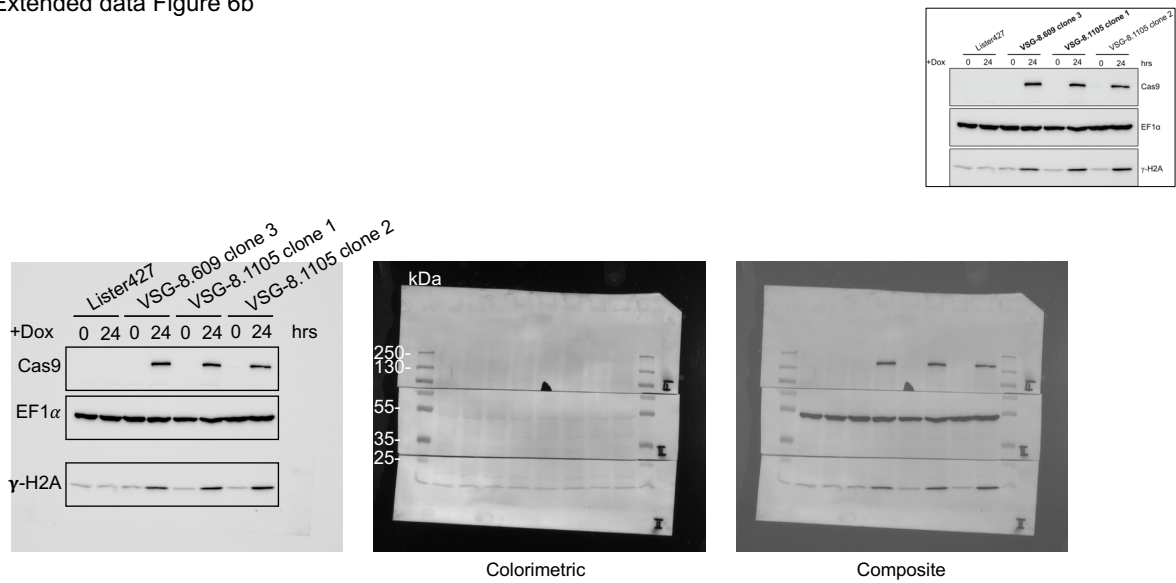

11.82-second exposure for Cas9, EF1 $\alpha$ ,  $\gamma$ -H2A. All membrane pieces (3) were exposed together.

Extended data Figure 6h

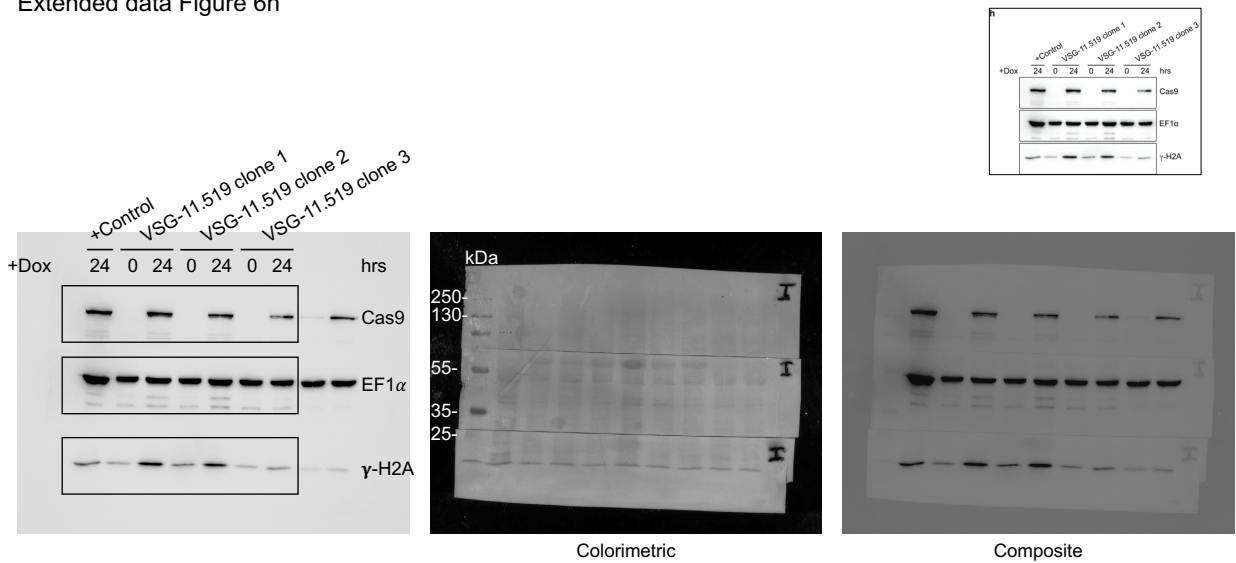

Extended data Figure 6h

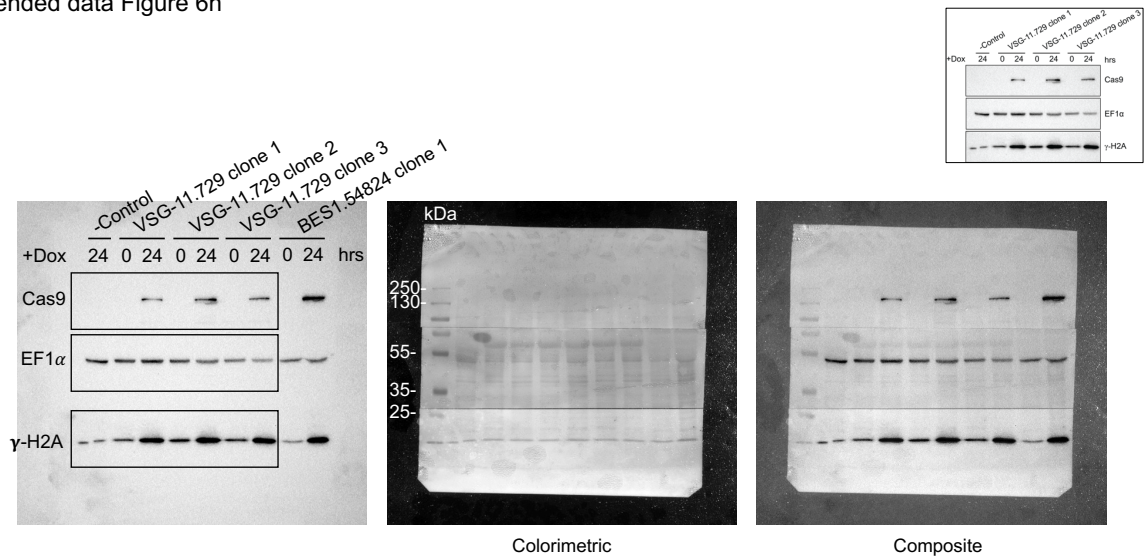

Supplement: MOESM1 [file 41586_2025_8720_MOESM1_ESM.pdf › 41586_2025_8720_MOESM1_ESM.pdf]
